# Supplementary material
Source: ML conference proceedings conference paper supplement (https://proceedings.mlr.press/v70/chen17h.html)
Supplement: Supplementary file 1 [file chen17h-supp.pdf]

## A. Proof Detailed Proofs in Section 3

### A.1. Proof of Proposition 3.4

*Proof.* Before we proceed, we first introduce the following lemma.

**Lemma A.1.** For  $|x| \leq \frac{5}{9}$ , we have

$$\left| (1+x)^{\frac{1}{2}} - 1 + \frac{x}{2} \right| \leq 3x^2.$$

*Proof of Lemma A.1.* By the Taylor Expansion with Lagrange remainder, we have

$$(1+x_0)^{-\frac{1}{2}} = 1 - \frac{1}{2}x_0 + \frac{1}{2} \frac{\partial^2(1+x_0)^{-\frac{1}{2}}}{\partial x^2} \Big|_{x=\theta x_0} x_0^2$$

for some  $\theta \in (0, 1)$ . Then for  $|x| \leq \frac{5}{9}$ , we have

$$\left| (1+x)^{-\frac{1}{2}} - 1 + \frac{x}{2} \right| = \frac{3}{8} \frac{1}{(1+\theta x)^{\frac{5}{2}}} x^2 \leq \frac{3}{8} \frac{1}{(1-\frac{5}{9})^{\frac{5}{2}}} x^2 = \frac{3^6}{2^8} x^2 \leq 3x^2.$$

□

We then proceed with the main proof. Since the optimization problem is symmetric about  $u$  and  $v$ , we only prove the claim for  $u$ . Specifically, we first compute  $u_{k+1} - u_k$ . By (2.2) and (2.3), we have

$$u_{k+1} = \frac{u_k + \eta X_k Y_k^\top v_k}{\|u_k + \eta X_k Y_k^\top v_k\|_2}.$$

Since  $\eta B d \leq \frac{1}{4}$ , by Cauchy-Schwarz inequality, we have

$$\begin{aligned} |x| &= |2\eta u_k^\top X_k Y_k^\top v_k + \eta^2 v_k^\top Y_k X_k^\top X_k Y_k^\top v_k| \\ &\leq 2\eta \|u_k\|_2 \|X_k\|_2 \|Y_k\|_2 \|v_k\|_2 + \eta^2 \|v_k\|_2 \|Y_k\|_2 \|X_k\|_2^2 \|Y_k\|_2 \|v_k\|_2 \\ &= 2\eta B d + \eta^2 B^2 d^2 < \frac{5}{9}, \end{aligned}$$

which satisfies the condition of Lemma A.1. We denote

$$\begin{aligned} T_1 &:= (1 + 2\eta u_k^\top X_k Y_k^\top v_k + \eta^2 v_k^\top Y_k X_k^\top X_k Y_k^\top v_k)^{-\frac{1}{2}} - 1 + \eta u_k^\top X_k Y_k^\top v_k \\ &\quad + \frac{1}{2} \eta^2 v_k^\top Y_k X_k^\top X_k Y_k^\top v_k - \frac{1}{2} \eta^2 v_k^\top Y_k X_k^\top X_k Y_k^\top v_k. \end{aligned}$$

Then by Lemma A.1, we have  $|T_1| \leq 3 \left( |2\eta u_k^\top X_k Y_k^\top v_k + \eta^2 v_k^\top Y_k X_k^\top X_k Y_k^\top v_k| \right)^2 + \frac{1}{2} \eta^2 B^2 d^2$ . Therefore, we have

$$\begin{aligned} u_{k+1} - u_k &= \|u_k + \eta X_k Y_k^\top v_k\|_2^{-1} (u_k + \eta X_k Y_k^\top v_k) - u_k \\ &= (1 - \eta u_k^\top X_k Y_k^\top v_k) (u_k + \eta X_k Y_k^\top v_k) - u_k + T_1 (u_k + \eta X_k Y_k^\top v_k) \\ &= (1 - \eta u_k^\top X_k Y_k^\top v_k) (u_k + \eta X_k Y_k^\top v_k) - u_k + R_k = \eta (X_k Y_k^\top v_k - u_k^\top X_k Y_k^\top v_k u_k) + R_k, \end{aligned}$$

where  $R_k = \left( R_k^{(1)}, R_k^{(2)}, \dots, R_k^{(d)} \right)^\top$  with

$$\begin{aligned} |R_k^{(i)}| &\leq \left| \left( 3(2\eta u_k^\top X_k Y_k^\top v_k + \eta^2 v_k^\top Y_k X_k^\top X_k Y_k^\top v_k)^2 + \frac{1}{2} \eta^2 B^2 d^2 \right) (u_k^{(i)} + \eta X_k Y_k^\top v_k) \right| \\ &\leq \left( 3\eta^2 (dB)^2 (2 + \eta (dB))^2 + \frac{1}{2} \eta^2 (dB)^2 \right) (1 + \eta dB) \\ &\leq \left( 3\eta^2 (dB)^2 \frac{9}{4} + \frac{1}{2} \eta^2 (dB)^2 \right) \frac{4}{5} \leq 20\eta^2 (dB)^2. \end{aligned}$$

□

### A.2. Proof of Theorem 3.5

*Proof.* We first bound the infinitesimal conditional variance. Since the optimization problem is symmetric about  $u$  and  $v$ , we only prove the claim for  $u$ .

$$\begin{aligned}
 & \frac{d}{dt} \mathbb{E} \left( U_\eta^{(j)}(t) - U_\eta^{(j)}(0) \right)^2 \Big|_{t=0} \\
 & \leq \eta^{-1} \text{tr} \left( \mathbb{E} \left[ (U_\eta(\eta) - U_\eta(0)) (U_\eta(\eta) - U_\eta(0))^\top \right] \Big| U_\eta(0) = u_k, V_\eta(0) = v_k \right) \\
 & = \eta^{-1} \mathbb{E} \left[ \left( \eta (X_k Y_k^\top u_k - u_k^\top X_k Y_k^\top v_k u_k) + f_k(u_k, v_k) \right)^\top \left( \eta (X_k Y_k^\top u_k - u_k^\top X_k Y_k^\top v_k u_k) + f_k(u_k, v_k) \right) \right] \\
 & = \eta \mathbb{E} \left( u_k^\top Y_k X_k^\top X_k Y_k^\top u_k - 2u_k^\top Y_k X_k^\top u_k u_k^\top X_k Y_k^\top v_k + u_k^\top u_k (u_k^\top X_k Y_k^\top v_k)^2 \right) + O(\eta^2).
 \end{aligned}$$

Furthermore, by Cauchy-Schwarz inequality, we have

$$\frac{d}{dt} \mathbb{E} \left( U_\eta^{(j)}(t) - U_\eta^{(j)}(0) \right)^2 \Big|_{t=0} \leq \eta \mathbb{E} \left( (dB)^2 + 2(dB)^2 + (dB)^2 \right) + O(\eta^2) \leq \eta 4(dB)^2 + O(\eta^2) = O(\eta).$$

By Section 4 of Chapter 7 in (Ethier and Kurtz, 2009), we know that, as  $\eta \rightarrow 0^+$ ,  $U_\eta(t)$  and  $V_\eta(t)$  weakly converge to the solution of (3.1) and (3.2) with the same initial. By definition of  $U_\eta(t)$  and  $V_\eta(t)$ , we complete the proof.  $\square$

### A.3. Proof of Theorem 3.6

*Proof.* Since  $P$  is an orthonormal matrix,  $\|H_j\|_2 = \|W_j\|_2 = 1$  for all  $j = 1, \dots, d$ . Thus, we have

$$\begin{aligned}
 \frac{d}{dt} H^{(i)} & = \lambda_i H^{(i)} - \sum_{j=1}^{2d} \lambda_j (H^{(j)})^2 H^{(i)} \\
 & = \lambda_i \sum_{j=1}^{2d} (H^{(j)})^2 H^{(i)} - \sum_{j=1}^{2d} \lambda_j (H^{(j)})^2 H^{(i)} \\
 & = H^{(i)} \sum_{j=1}^{2d} (\lambda_i - \lambda_j) (H^{(j)})^2.
 \end{aligned}$$

We then verify (3.8) satisfies (3.7). By (Evans, 1988), we know that since  $H_j(t)$  is continuously differentiable in  $t$ , the solution to the ODE is unique. For notational simplicity, we denote

$$S^{(j)}(t) = H^{(j)}(0) \exp(\lambda_j t).$$

Then we have

$$H^{(i)}(t) = \frac{S^{(i)}(t)}{\sqrt{\sum_{j=1}^{2d} (S^{(j)}(t))^2}}.$$

Now we only need to verify

$$\begin{aligned}
 \frac{d}{dt} H^{(i)}(t) & = \frac{(\lambda_i S^{(i)}(t)) \sqrt{\sum_{j=1}^{2d} (S^{(j)}(t))^2} - \frac{(2 \sum_{j=1}^{2d} \lambda_j (S^{(j)}(t))^2) S^{(i)}(t)}{2 \sqrt{\sum_{j=1}^{2d} (S^{(j)}(t))^2}}}{\sum_{j=1}^{2d} (S^{(j)}(t))^2} \\
 & = \lambda_i \frac{S^{(i)}(t)}{\sqrt{\sum_{j=1}^{2d} (S^{(j)}(t))^2}} - \sum_{j=1}^{2d} \lambda_j \frac{(S^{(j)}(t))^2}{\sum_{j=1}^{2d} (S^{(j)}(t))^2} \frac{S^{(i)}(t)}{\sqrt{\sum_{j=1}^{2d} (S^{(j)}(t))^2}} \\
 & = \lambda_i H^{(i)}(t) - \sum_{j=1}^{2d} \lambda_j (H^{(j)}(t))^2 H^{(i)}(t),
 \end{aligned}$$

which completes the proof.  $\square$

## B. Proof Detailed Proofs in Section 4

### B.1. Proof of Theorem 4.1

*Proof.* We calculate the infinitesimal conditional expectation and variance for  $Z_\eta^{(i)}$ ,  $i \neq j$ .

$$\begin{aligned} \frac{d}{dt} \mathbb{E} Z_\eta^{(i)}(t) \Big|_{t=0} &= \eta^{-1} \mathbb{E} \left[ Z_\eta^{(i)}(\eta) - Z_\eta^{(i)}(0) \mid H_\eta(0) = h \right] \\ &= \eta^{-1} \mathbb{E} \left[ \eta^{-1/2} \left( H_\eta^{(i)}(\eta) - H_\eta^{(i)}(0) \right) \mid H_\eta(0) = h \right] \\ &= \eta^{-1/2} h^{(i)} \sum_{l=1}^{2d} (\lambda_i - \lambda_l) (h^{(l)})^2 + O(\eta) = Z_\eta^{(i)} (\lambda_i - \lambda_j) + o(1), \end{aligned} \quad (\text{B.1})$$

where the last equality comes from the assumption that the algorithm starts near  $j^{\text{th}}$  column of  $P$ ,  $j \neq 1$ , i.e.,  $h \approx e_j$ . To compute variance, we first compute  $\widehat{\Lambda}$ ,

$$\widehat{\Lambda} = P^\top Q P = \frac{1}{2} \begin{pmatrix} \overline{Y} \overline{X}^\top + \overline{X} \overline{Y}^\top & \overline{Y} \overline{X}^\top - \overline{X} \overline{Y}^\top \\ -\overline{Y} \overline{X}^\top + \overline{X} \overline{Y}^\top & -\overline{Y} \overline{X}^\top - \overline{X} \overline{Y}^\top \end{pmatrix},$$

where  $Q$  is defined in (3.3). Then we analyze  $e_i^\top \widehat{\Lambda} e_j$  by cases:

$$e_i^\top \widehat{\Lambda} e_j = \begin{cases} \frac{1}{2} \left( \overline{X}^{(i)} \overline{Y}^{(j)} + \overline{X}^{(j)} \overline{Y}^{(i)} \right) & \text{if } \max(i, j) \leq d, \\ \frac{1}{2} \left( -\overline{X}^{(j)} \overline{Y}^{(i-d)} + \overline{X}^{(i-d)} \overline{Y}^{(j)} \right) & \text{if } j \leq d < i, \\ \frac{1}{2} \left( \overline{X}^{(j-d)} \overline{Y}^{(i)} - \overline{X}^{(i)} \overline{Y}^{(j-d)} \right) & \text{if } i \leq d < j, \\ \frac{1}{2} \left( -\overline{X}^{(i-d)} \overline{Y}^{(j-d)} - \overline{X}^{(j-d)} \overline{Y}^{(i-d)} \right) & \text{if } \min(i, j) > d, \end{cases}$$

which further implies

$$\begin{aligned} \frac{d}{dt} \mathbb{E} (Z_\eta^{(i)}(t) - Z_\eta^{(i)}(0))^2 \Big|_{t=0} &= \eta^{-1} \mathbb{E} [(Z_\eta^{(i)}(\eta) - Z_\eta^{(i)}(0))^2 \mid H_\eta(0) = h] \\ &= \eta^{-2} \mathbb{E} [\eta^2 (\widehat{\Lambda} h - h^\top \widehat{\Lambda} h) (\widehat{\Lambda} h - h^\top \widehat{\Lambda} h)^\top]_{i,i} + O(\eta) \\ &= \mathbb{E} (e_i^\top \widehat{\Lambda} e_j e_j^\top \widehat{\Lambda}^\top e_i) + o(1) \\ &= \frac{1}{4} (\gamma_i \omega_j + \gamma_j \omega_i + 2 \text{sign}(i - d - 1/2) \cdot \text{sign}(j - 1/2 - d) \cdot \alpha_{ij}). \end{aligned} \quad (\text{B.2})$$

By (B.1) and (B.2), we get the limit stochastic differential equation,

$$dZ^{(i)}(t) = -(\lambda_j - \lambda_i) Z^{(i)}(t) dt + \beta_{ij} dB(t).$$

□

### B.2. Proof of Proposition 4.2

*Proof.* Our analysis is based on approximating  $z_{\eta,k}^{(1)}$  by its continuous approximation  $Z_\eta^{(1)}(t)$ , which is normal distributed at time  $t$ . By simple manipulation, we have

$$\mathbb{P} \left( (h_{\eta, N_1}^{(2)})^2 \leq 1 - \delta^2 \right) = \mathbb{P} \left( (z_{\eta, N_1}^{(2)})^2 \leq \eta^{-1} (1 - \delta^2) \right) \geq \mathbb{P} (|z_{\eta, N_1}^{(1)}| \geq \eta^{-\frac{1}{2}} \delta).$$

We then prove  $\mathbb{P} \left( |z_{\eta, N_1}^{(1)}| \geq \eta^{-\frac{1}{2}} \delta \right) \geq 1 - \nu$ . At time  $t$ ,  $z_{\eta,k}^{(1)}$  approximates to a normal distribution with mean 0 and variance  $\frac{\beta_{12}^2}{2(\lambda_1 - \lambda_2)} [\exp(2(\lambda_1 - \lambda_2)\eta N_1) - 1]$ . Therefore, let  $\Phi(x)$  be the CDF of  $N(0, 1)$ , we have

$$\mathbb{P} \left( \frac{|z_{\eta, N_1}^{(1)}|}{\sqrt{\frac{\beta_{12}^2}{2(\lambda_1 - \lambda_2)} \cdot [\exp(2(\lambda_1 - \lambda_2)\eta N_1) - 1]}} \geq \Phi^{-1} \left( \frac{1 + \nu}{2} \right) \right) \approx 1 - \nu,$$

which requires

$$\eta^{-\frac{1}{2}}\delta \leq \Phi^{-1}\left(\frac{1+\nu}{2}\right) \cdot \sqrt{\frac{\beta_{12}^2}{2(\lambda_1 - \lambda_2)} \cdot [\exp(2(\lambda_1 - \lambda_2)\eta N_1) - 1]}.$$

Solving the above inequality, we get

$$N_1 = \frac{\eta^{-1}}{2(\lambda_1 - \lambda_2)} \log\left(\frac{2\eta^{-1}\delta^2(\lambda_1 - \lambda_2)}{\Phi^{-1}\left(\frac{1+\nu}{2}\right)^2 \beta_{12}^2} + 1\right).$$

□

### B.3. Proof of Proposition 4.3

*Proof.* After Phase I, we restart our counter, i.e.,  $h_{\eta,0}^{(1)} = \delta$ . By (3.8) and  $h_{\eta,N_2}^{(1)}$  approximating to the process  $H^{(1)}(\eta N_2)$ , we obtain

$$\begin{aligned} \left(h_{\eta,N_2}^{(1)}(t)\right)^2 &= \left(H^{(1)}(\eta N_2)\right)^2 = \left(\sum_{j=1}^{2d} \left(\left(H^{(j)}(0)\right)^2 \exp(2\lambda_j \eta N_2)\right)\right)^{-1} \left(H^{(1)}(0)\right)^2 \exp(2\lambda_1 \eta N_2) \\ &\geq \left(\delta^2 \exp(2\lambda_1 \eta N_2) + (1 - \delta^2) \exp(2\lambda_2 \eta N_2)\right)^{-1} \delta^2 \exp(2\lambda_1 \eta N_2), \end{aligned}$$

which requires

$$\left(\delta^2 \exp(2\lambda_1 \eta N_2) + (1 - \delta^2) \exp(2\lambda_2 \eta N_2)\right)^{-1} \delta^2 \exp(2\lambda_1 \eta N_2) \geq \eta^{-1}(1 - \delta^2).$$

Solving the above inequality, we get

$$N_2 = \frac{\eta^{-1}}{2(\lambda_1 - \lambda_2)} \log \frac{1 - \delta^2}{\delta^2}.$$

□

### B.4. Proof of Theorem 4.4

*Proof.* For  $i = 2, \dots, 2d$ , we compute the infinitesimal conditional expectation and variance,

$$\begin{aligned} \frac{d}{dt} \mathbb{E} Z_{\eta}^{(i)}(t) \Big|_{t=t_0} &= \eta^{-1} \mathbb{E} \left[ Z_{\eta}^{(i)}(t_0 + \eta) - Z_{\eta}^{(i)}(t_0) \mid H^{\eta}(t_0) = h \right] \\ &= \eta^{-1/2} h_i \sum_{j=1}^{2d} (\lambda_i - \lambda_j) h_j^2 + O(\eta) = Z^{(i)}(\lambda_i - \lambda_1) + o(1), \\ \frac{d}{dt} \mathbb{E} \left( Z_{\eta}^{(i)}(t) - Z_{\eta}^{(i)}(t_0) \right)^2 \Big|_{t=t_0} &= \eta^{-1} \mathbb{E} \left[ \left( Z_{\eta}^{(i)}(t_0 + \eta) - Z_{\eta}^{(i)}(t_0) \right)^2 \mid H^{\eta}(t_0) = h \right] \\ &= \eta^{-2} \mathbb{E} \left[ \eta^2 (\widehat{\Lambda} h - h^{\top} \widehat{\Lambda} h h) (\widehat{\Lambda} h - h^{\top} \widehat{\Lambda} h h)^{\top} \right]_{i,i} + O(\eta) \\ &= \mathbb{E} (e_i^{\top} \widehat{\Lambda} e_1 e_1^{\top} \widehat{\Lambda}^{\top} e_i) + o(1) = \frac{1}{4} (\gamma_i \omega_1 + \gamma_1 \omega_i - 2 \text{sign}(i - d - 1/2) \alpha_{i1}) + o(1). \end{aligned}$$

Following similar lines to the proof of Theorem 4.1, by Section 4 of Chapter 7 in (Ethier and Kurtz, 2009), we have for each  $k = 2, \dots, 2d$ , if  $Z^{(i)}(0) = \eta^{-1/2} h_{\eta,0}^{(i)}$  as  $\eta \rightarrow 0^+$ , then the stochastic process  $\eta^{-1/2} h_{\eta, \lfloor t\eta^{-1} \rfloor}^{(k)}$  weakly converges to the solution of the stochastic differential equation (4.3). □

### B.5. Proof of Proposition 4.5

*Proof.* Since we restart our counter, we have  $\sum_{i=2}^{2d} (z_{\eta,0}^{(i)})^2 = \eta^{-1} \delta^2$ . Since  $z_{\eta,k}^{(i)}$  approximates to  $Z^{(i)}(\eta k)$  and its second moment:

$$\mathbb{E} \left( Z^{(i)}(t) \right)^2 = \frac{\beta_{i1}^2}{2(\lambda_1 - \lambda_i)} + \left( \left( Z^{(i)}(0) \right)^2 - \frac{\beta_{i1}^2}{2(\lambda_1 - \lambda_i)} \right) \exp[-2(\lambda_1 - \lambda_i)t], \quad \text{for } i \neq 1,$$

we use the Markov inequality:

$$\begin{aligned}
 \mathbb{P}\left(\sum_{i=2}^{2d} \left(h_{\eta, N_3}^{(i)}\right)^2 > \epsilon\right) &\leq \frac{\mathbb{E}\left(\sum_{i=2}^{2d} \left(h_{\eta, N_3}^{(i)}\right)^2\right)}{\epsilon} = \frac{\mathbb{E}\left(\sum_{i=2}^{2d} \left(z_{\eta, N_3}^{(i)}\right)^2\right)}{\eta^{-1}\epsilon} \\
 &= \frac{1}{\eta^{-1}\epsilon} \sum_{i=2}^{2d} \frac{\beta_{i1}^2}{2(\lambda_1 - \lambda_i)} \left(1 - \exp(-2(\lambda_1 - \lambda_i)\eta N_3)\right) + \left(z_{\eta, 0}^{(i)}\right)^2 \exp[-2(\lambda_1 - \lambda_i)\eta N_3] \\
 &\leq \frac{1}{\eta^{-1}\epsilon} \left( \frac{d \max_{2 \leq i \leq d} (\beta_{i1}^2)}{2(\lambda_1 - \lambda_2)} \left(1 - \exp(-2(\lambda_1 - \lambda_d)\eta N_3)\right) \right. \\
 &\quad \left. + \frac{d \max_{d+1 \leq i \leq 2d} (\beta_{i1}^2)}{2(\lambda_1 + \lambda_d)} \left(1 - \exp(-4\lambda_1\eta N_3)\right) + \delta^2 \exp[-2(\lambda_1 - \lambda_2)\eta N_3] \right) \\
 &\leq \frac{1}{\eta^{-1}\epsilon} \left( \frac{d \max_{1 \leq i \leq d} (\beta_{i1}^2)}{(\lambda_1 - \lambda_2)} + \delta^2 \exp[-2(\lambda_1 - \lambda_2)\eta N_3] \right).
 \end{aligned}$$

To guarantee  $\frac{1}{\eta^{-1}\epsilon} \left( \frac{d \max_{1 \leq i \leq d} (\beta_{i1}^2)}{(\lambda_1 - \lambda_2)} + \delta^2 \exp[-2(\lambda_1 - \lambda_2)\eta N_3] \right) \leq \frac{1}{4}$ , we get:

$$N_3 \geq \frac{\eta^{-1}}{2(\lambda_1 - \lambda_2)} \log \left( \frac{4(\lambda_1 - \lambda_2)\delta^2}{(\lambda_1 - \lambda_2)\epsilon\eta^{-1} - 4d \max_{1 \leq i \leq d} \beta_{i1}^2} \right).$$

□

### B.6. Proof of Corollary 4.6

*Proof.* First, we prove that  $\|u_{\eta, k} - \hat{u}\|_2^2 + \|v_{\eta, k} - \hat{v}\|_2^2$  can be bounded by  $3 \sum_{i=2}^{2d} \left(h_{\eta, k}^{(i)}\right)^2$ , when it is near the optima.

Recall that  $h_{\eta, k} = \frac{1}{\sqrt{2}} P^\top (u_{\eta, k}^\top v_{\eta, k}^\top)^\top$  and  $e_1 = \hat{h} = \frac{1}{\sqrt{2}} P(\hat{u}^\top \hat{v}^\top)^\top$ . Our analysis has shown that when  $k$  is large enough, the SGD iterates near the optima. Then we have

$$\begin{aligned}
 \|u_{\eta, k} - \hat{u}\|_2^2 + \|v_{\eta, k} - \hat{v}\|_2^2 &= 4 - 2\langle u_{\eta, k}, \hat{u} \rangle - 2\langle v_{\eta, k}, \hat{v} \rangle = 4 - 4h_{\eta, k}^1 \\
 &= 4 - 4\sqrt{1 - \sum_{i=2}^{2d} \left(h_{\eta, k}^{(i)}\right)^2} = \frac{16 \sum_{i=2}^{2d} \left(h_{\eta, k}^{(i)}\right)^2}{4 + 4\sqrt{1 - \sum_{i=2}^{2d} \left(h_{\eta, k}^{(i)}\right)^2}} \leq 3 \sum_{i=2}^{2d} \left(h_{\eta, k}^{(i)}\right)^2, \tag{B.3}
 \end{aligned}$$

where the last inequality holds since  $k$  is large enough such that  $\sum_{i=2}^{2d} \left(h_{\eta, k}^{(i)}\right)^2$  is sufficiently small. By Propositions 4.2, 4.3, and 4.5, the total iteration number is

$$N = N_1 + N_2 + N_3. \tag{B.4}$$

To explicitly bound  $N$  in (B.4) in terms of sample size  $n$ , we consider

$$N_1 = \frac{\eta^{-1}}{2(\lambda_1 - \lambda_2)} \log \left( \frac{2\eta^{-1}\delta^2(\lambda_1 - \lambda_2)}{\Phi^{-1}\left(\frac{1+\nu}{2}\right)^2 \beta_{12}^2} + 1 \right), \tag{B.5}$$

$$N_2 = \frac{\eta^{-1}}{2(\lambda_1 - \lambda_2)} \log \frac{1 - \delta^2}{\delta^2}, \tag{B.6}$$

$$N_3 = \frac{\eta^{-1}}{2(\lambda_1 - \lambda_2)} \log \left( \frac{4(\lambda_1 - \lambda_2)\delta^2}{(\lambda_1 - \lambda_2)\epsilon\eta^{-1} - 4d \max_{1 \leq i \leq d} \beta_{i1}^2} \right). \tag{B.7}$$

Given a small enough  $\epsilon$ , we choose  $\eta$  as follow:

$$\eta \asymp \frac{\epsilon(\lambda_1 - \lambda_2)}{d \max_{1 \leq i \leq d} \beta_{i1}^2}. \quad (\text{B.8})$$

Combining the above sample complexities (B.5), (B.6), (B.7), and (B.8), we get

$$N = O \left[ \frac{d}{\epsilon(\lambda_1 - \lambda_2)^2} \log \left( \frac{d}{\epsilon} \right) \right]. \quad (\text{B.9})$$

By Proposition 4.5 with (B.3), given  $\nu < 1/9$ , after at most  $N$  iterations, we have

$$\|u_{\eta,n} - \hat{u}\|_2^2 + \|v_{\eta,n} - \hat{v}\|_2^2 \leq 3\|h_{\eta,n} - \hat{h}\|_2^2 \leq 3\epsilon,$$

with probability at least  $\frac{2}{3}$ . □
